# Supplementary material
Source: ML conference proceedings conference paper supplement (https://www.ecva.net/papers/eccv_2020/papers_ECCV/html/123510392_ECCV_2020_paper.php)
Supplement: Supplementary file 2 [file 123510392-supp.zip]

Archive with 3 entries (2 files):
- 6100-supp/
- 6100-supp/supplementary.pdf
- 6100-supp/simulation.mp4
